# Supplementary material for: Integrated Fruit Ripeness Assessment System Based on an Artificial Olfactory Sensor and Deep Learning
Source: MDPI journal article supplement (doi:10.3390/foods13050793), 2024-03-04
Supplement: s1 [file s1]

# Supporting information

**Table S1.** Types, serial numbers, corresponding names, and abbreviations of dyes in literature.

| Type                           | Number | Name                                                      | Abbreviation |
|--------------------------------|--------|-----------------------------------------------------------|--------------|
| Aldehyde/ketone-sensitive dyes | 1      | 2,4-Dinitrophenylhydrazine                                | DNPH         |
|                                | 2      | Pararosaniline                                            | PA           |
|                                | 3      | Merocyanine 540                                           | MC540        |
| Solvatochromic dyes            | 4      | Nile red                                                  | NR           |
|                                | 5      | Disperse orange #3                                        | DO3          |
|                                | 6      | o-Tolidine                                                | o-TOL        |
| Redox dyes                     | 7      | o-Dianisidine                                             | ODA          |
|                                | 8      | Methylene blue                                            | MB           |
|                                | 9      | CoTCPP                                                    | --           |
| Lewis acidic dyes              | 10     | 2,3,7,8,12,13,17,18-Octaethyl-21H,23H porphine nickel(II) | NiOEP        |
|                                | 11     | FeTcp                                                     | --           |
|                                | 12     | Bromophenol blue                                          | BPB          |
| pH indicators                  | 13     | Pyrocatechol violet                                       | PV           |
|                                | 14     | Bromocresol purple                                        | BP           |
|                                | 15     | Methyl red                                                | MR           |
|                                | 16     | Nitrazine yellow                                          | NY           |
|                                | 17     | Thymol blue                                               | TB           |
|                                | 18     | m-Cresol Purple                                           | CP           |
|                                | 19     | Cresol red                                                | CR           |
|                                | 20     | Acid yellow 36                                            | AY 36        |
|                                | 21     | 3,3',5,5'-Tetraiodophenolsulfonphthalein                  | TSF          |
|                                | 22     | Indigo carmine                                            | IC           |
|                                | 23     | Basic yellow1                                             | BY1          |
|                                | 24     | Bromopyrogallol red                                       | BPR          |
|                                | 25     | Leuco malachite green                                     | LMG          |

**Table S2.** Average sensory score of the banana during storage for each group. Evaluator A-E represent our study's participants, who were aged between 40 to 50 years and included three men and two women.

| Storage time (D) | Evaluator A | Evaluator B | Evaluator C | Evaluator D | Evaluator E | Average value |
|------------------|-------------|-------------|-------------|-------------|-------------|---------------|
| 0                | 1           | 2           | 0           | 1           | 2           | 1.2           |
| 1                | 3           | 2           | 1           | 1           | 3           | 2             |
| 2                | 5           | 5           | 3           | 4           | 4           | 4.2           |
| 3                | 6           | 5           | 4           | 6           | 5           | 5.2           |
| 4                | 7           | 6           | 5           | 5           | 6           | 5.8           |
| 5                | 6           | 7           | 5           | 6           | 7           | 6.2           |
| 6                | 7           | 8           | 8           | 7           | 8           | 7.6           |
| 7                | 9           | 9           | 10          | 9           | 9           | 9.2           |
| 8                | 10          | 9           | 10          | 10          | 10          | 9.8           |

0~3: unripe; 4~7: ripe; 8-10: overripe.

**Table S3.** Average sensory score of the mango during storage for each group. Evaluator A-E represent our study's participants, who were aged between 40 to 50 years and included three men and two women.

| Storage time (D) | Evaluator A | Evaluator B | Evaluator C | Evaluator D | Evaluator E | Average value |
|------------------|-------------|-------------|-------------|-------------|-------------|---------------|
| 0                | 1           | 0           | 1           | 2           | 0           | 0.8           |
| 1                | 1           | 2           | 0           | 1           | 2           | 1.2           |
| 2                | 2           | 2           | 3           | 1           | 3           | 2.2           |
| 3                | 4           | 5           | 4           | 4           | 3           | 4.0           |
| 4                | 4           | 5           | 3           | 5           | 4           | 4.2           |
| 5                | 6           | 4           | 5           | 4           | 5           | 4.8           |
| 6                | 6           | 7           | 4           | 5           | 7           | 5.8           |
| 7                | 6           | 7           | 6           | 5           | 7           | 6.2           |
| 8                | 7           | 8           | 8           | 7           | 8           | 7.6           |
| 9                | 8           | 10          | 8           | 9           | 9           | 8.8           |
| 10               | 9           | 10          | 9           | 10          | 10          | 9.6           |

0~3: unripe; 4~7: ripe; 8-10: overripe.

**Table S4.** Average sensory score of the peach during storage for each group. Evaluator A-E represent our study's participants, who were aged between 40 to 50 years and included three men and two women.

| Storage time (D) | Evaluator A | Evaluator B | Evaluator C | Evaluator D | Evaluator E | Average value |
|------------------|-------------|-------------|-------------|-------------|-------------|---------------|
| 0                | 1           | 2           | 0           | 1           | 0           | 0.8           |
| 1                | 2           | 3           | 1           | 2           | 3           | 2.2           |
| 2                | 4           | 4           | 3           | 4           | 5           | 4             |
| 3                | 4           | 5           | 4           | 5           | 5           | 4.6           |
| 4                | 5           | 5           | 5           | 6           | 5           | 5.2           |
| 5                | 6           | 6           | 5           | 4           | 6           | 5.4           |
| 6                | 6           | 7           | 5           | 5           | 6           | 5.8           |
| 7                | 8           | 8           | 6           | 7           | 7           | 7.2           |
| 8                | 7           | 8           | 7           | 9           | 8           | 7.8           |
| 9                | 8           | 8           | 9           | 10          | 8           | 8.6           |
| 10               | 9           | 9           | 10          | 10          | 9           | 9.4           |

0~3: unripe; 4~7: ripe; 8-10: overripe.

**Table S5.** Identification of VOCs and their relative abundances released from fruit during storage time by GC–MS.

| Fruit  | Compound         | Relative abundance (%) |       |          | Match factor | Ref. |
|--------|------------------|------------------------|-------|----------|--------------|------|
|        |                  | Unripe                 | Ripe  | Overripe |              |      |
| Mango  | 3-carene         | -                      | 47.36 | 33.22    | 97.9         | [42] |
|        | (+)-limonene     | 7.95                   | 6.35  | 4.68     | 98.3         | [43] |
|        | $\beta$ -myrcene | 8.91                   | 8.40  | 4.10     | 87.6         | [44] |
| Peach  | benzaldehyde     | 1.40                   | 43.58 | 20.09    | 91.3         | [45] |
|        | ethyl acetate    | -                      | -     | 33.67    | 90.0         | [46] |
|        | hexyl acetate    | -                      | -     | 10.76    | 90.4         | [47] |
| Banana | ethanol          | 11.06                  | 1.50  | 3.16     | 74.0         | [48] |
|        | trans-2-hexenal  | -                      | 9.67  | -        | 97.0         | [49] |
|        | isoamyl acetate  | -                      | 8.90  | 7.28     | 90.0         | [49] |

"-" indicates that it is not detected.

**Table S6.** ED values' reference range to three ripeness levels.

| Ripeness | Mango        | Peach        | Banana       |
|----------|--------------|--------------|--------------|
| Unripe   | <81.63       | <72.12       | <85.15       |
| Ripe     | 81.63-136.15 | 72.12-126.31 | 85.15-144.32 |
| Overripe | >136.15      | >126.31      | >144.32      |

The ED value of each sample was obtained after color calibration. This study firstly labels the ripeness of each fruit sample with different storage intervals based on firmness values and sensory evaluation. According to the ripeness of each sample, the ED value ranges corresponding to the ripeness level are obtained. These ED value ranges are utilized for the prediction of the ripeness state of other samples.

**Table S7.** Comparison of test accuracy among this study with previous studies.

| Method                      | Test accuracy (%) | Ref.       |
|-----------------------------|-------------------|------------|
| DenseNet                    | 82.20             | This study |
| Part-A <sup>2</sup> -anchor | 79.47             | [51]       |
| BEVFusion                   | 75.0              | [52]       |
| PointRCNN                   | 57.94             | [53]       |
| Part-A <sup>2</sup>         | 61.79             | [54]       |
| PV-RCNN                     | 62.81             | [55]       |
| F-PointNet                  | 56.02             | [56]       |

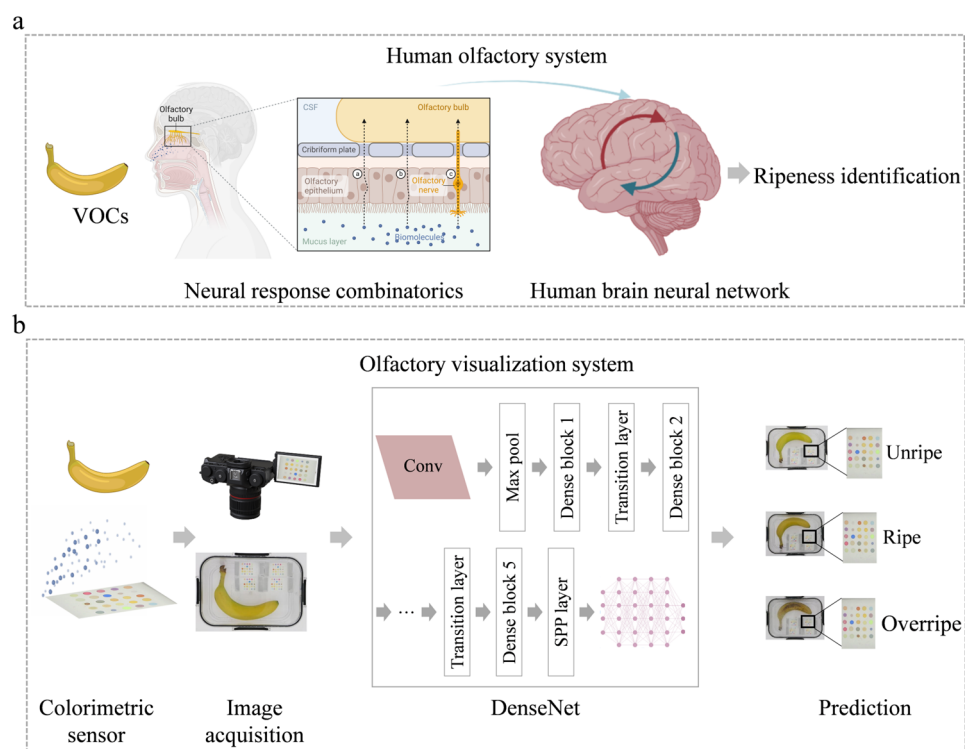

**Figure S1.** Working mechanism of the (a) human olfactory and (b) olfactory visualization system utilizing color sensing combinatories with DCNN.



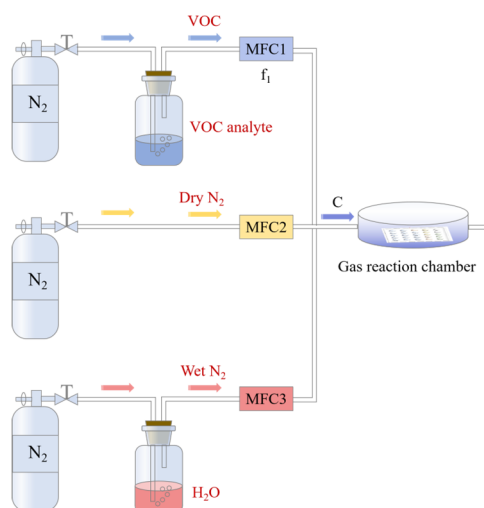

**Figure S2.** Gas distribution device. Different concentrations of a gas can be generated by mixing a known concentration of the gas with nitrogen gas. The concentration of the resulting diluted VOCs can be calculated using the following equation, where  $C$  represents the concentration of the diluted VOCs (ppm),  $C_1$  represents the original concentration of the VOCs (ppm),  $f_1$  represents the flow rate of the pipeline containing the VOCs (mL/min), and  $f_2$  represents the flow rate of the nitrogen gas in the other pipelines (mL/min):

$$C = \frac{C_1 \times f_1}{f_1 + f_2}$$

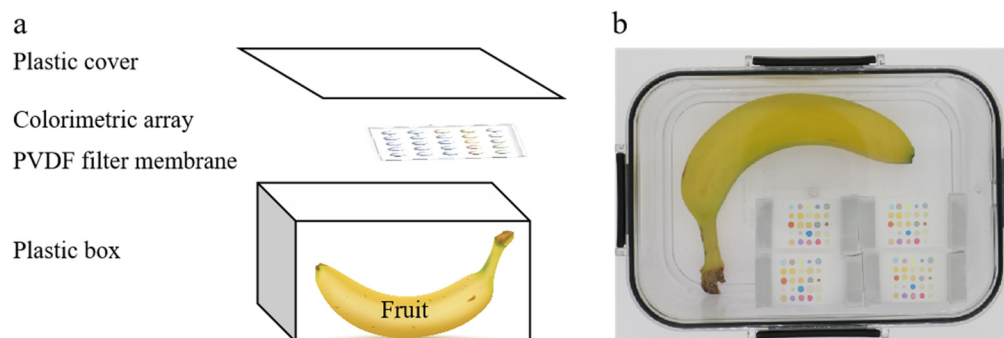

**Figure S3.** (a) Schematic diagram and (b) photograph of the fruit packaged transparent container with colorimetric sensor arrays.

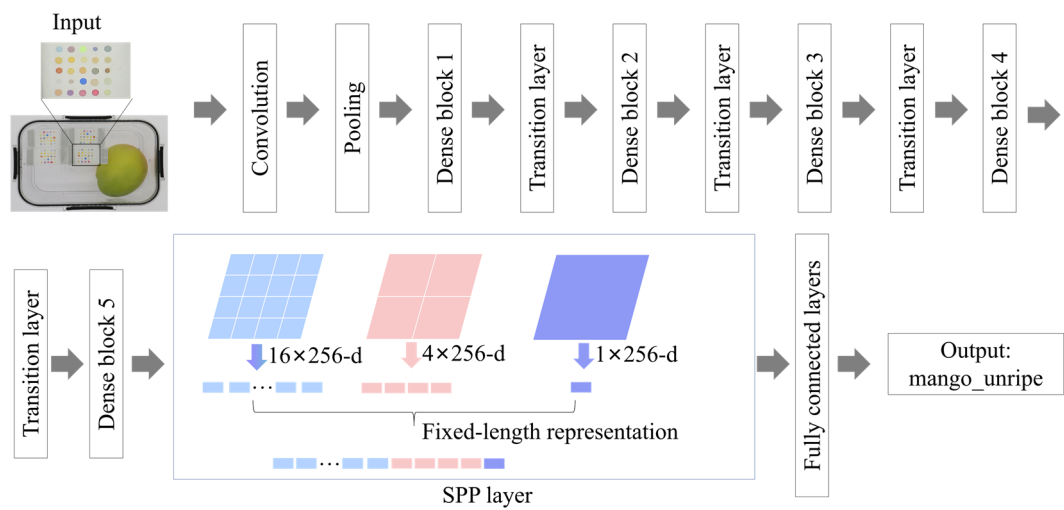

**Figure S4.** Overview of DenseNet model architecture. The DenseNet model framework is demonstrated using the input of the unripe mango label as an example.

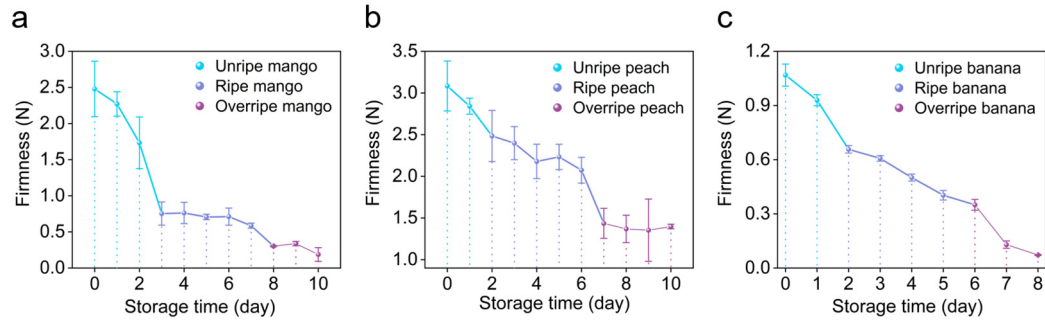

**Figure S5.** Firmness variation of (a) mango, (b) peach, and (c) banana during the storage time.

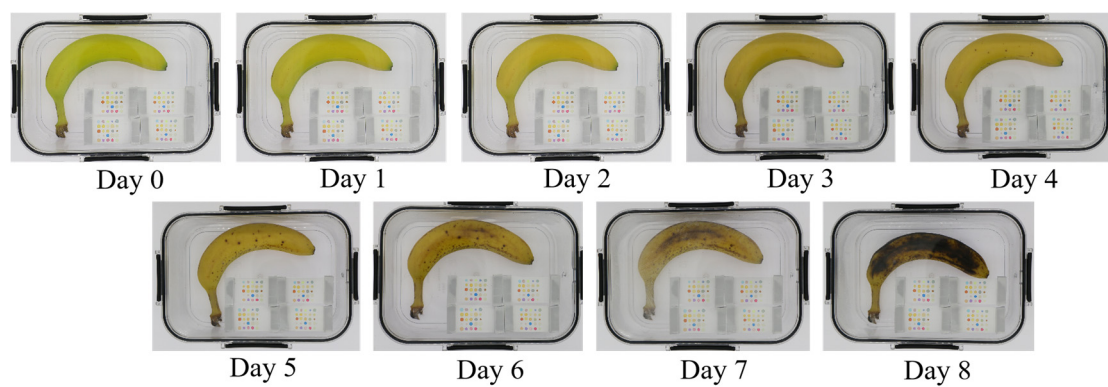

**Figure S6.** Appearance of banana changes with the storage time.

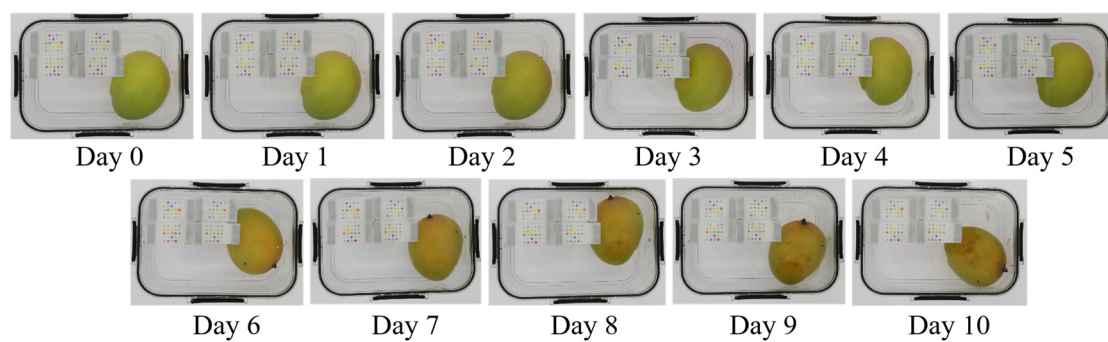

**Figure S7.** Appearance of mango changes with the storage time.

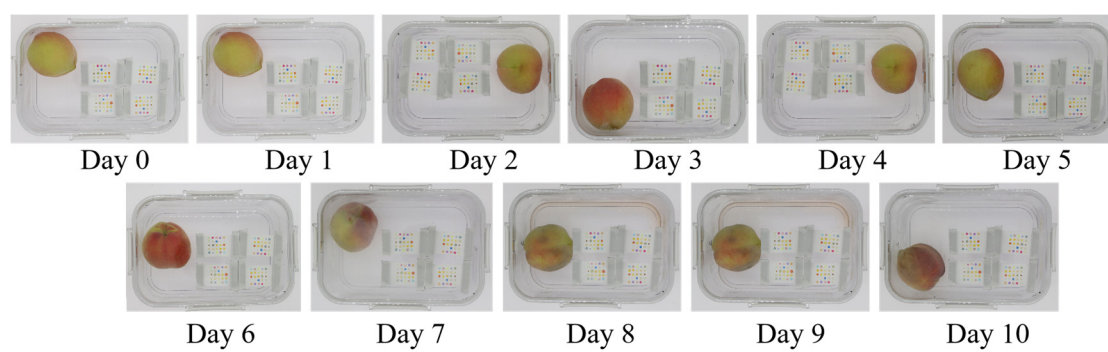

**Figure S8.** Appearance of peach changes with the storage time.

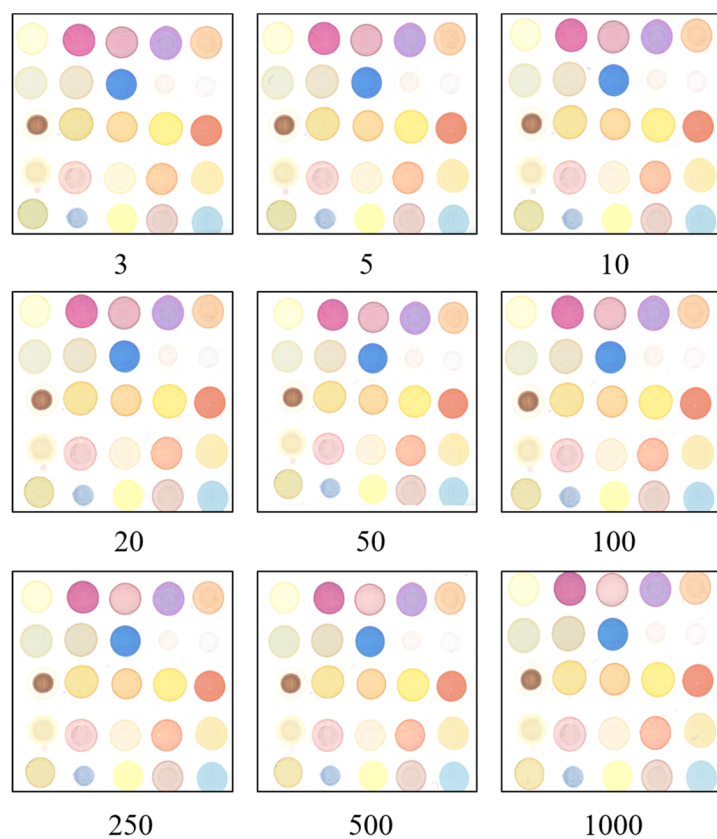

**Figure S9.** Images of the colorimetric sensor array's response to the trans-2-hexenal with different concentrations range from 3 to 1000 ppm.



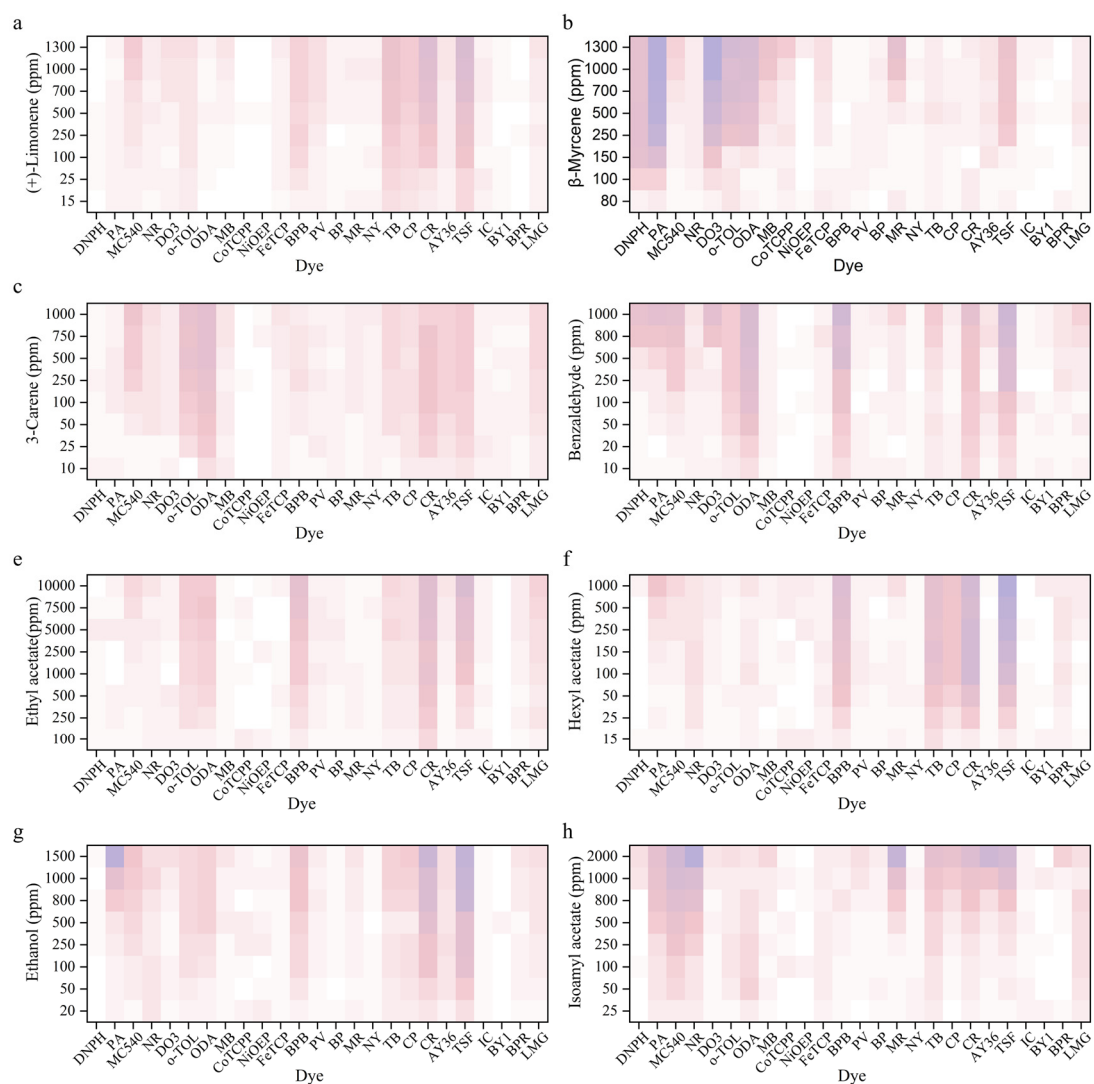

**Figure S10.** ED heatmaps of the characteristic VOCs with different concentrations, including (a) (+)-limonene, (b)  $\beta$ -myrcene, (c) 3-carene, (d) benzaldehyde, (e) ethyl acetate, (f) hexyl acetate, (g) ethanol, and (h) isoamyl acetate.

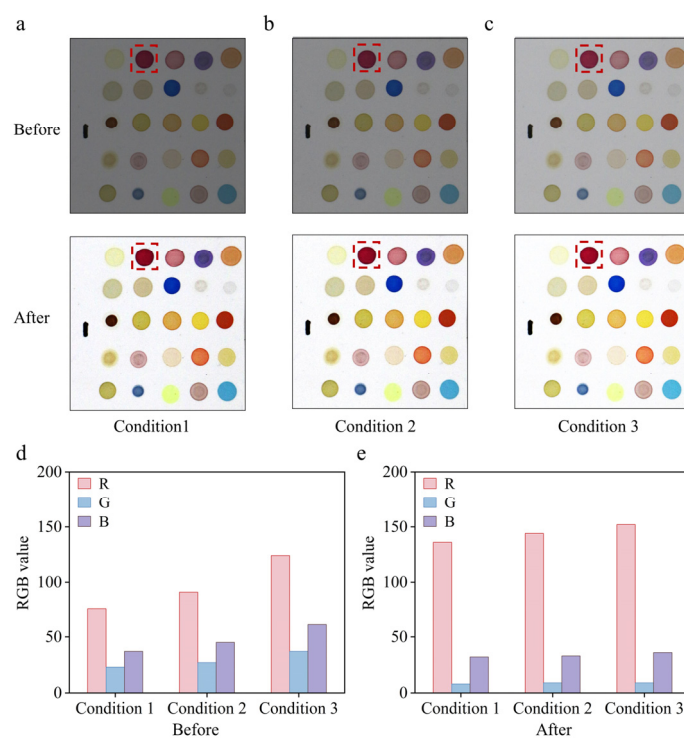

**Figure S11.** (a-c) Color balancing performed by internal calibration makers under various light conditions. Changes in the RGB values of pararosanine dye as represented by images (d) before color calibration and (e) after color calibration.

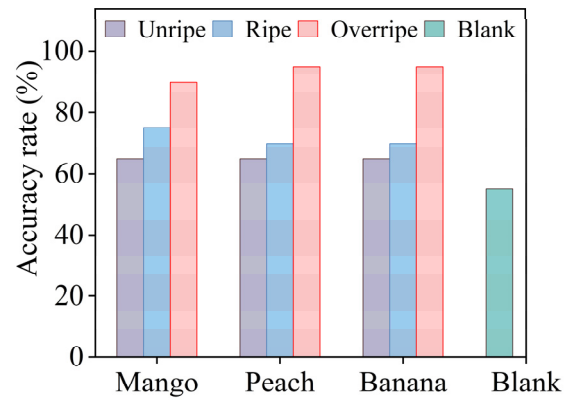

**Figure S12.** Detection accuracy rate for fruit ripeness based on ED calculations after color calibration.

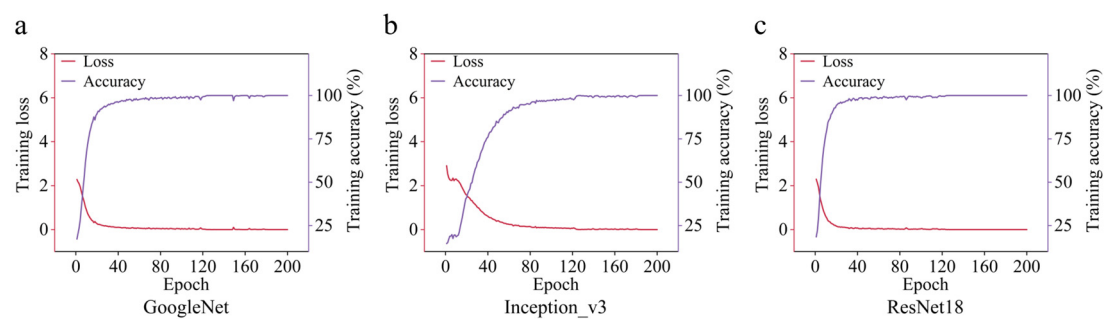

**Figure S13.** Training loss and training accuracy of the (a) GoogleNet, (b) Inception\_v3, and (c)

ResNet18 model.

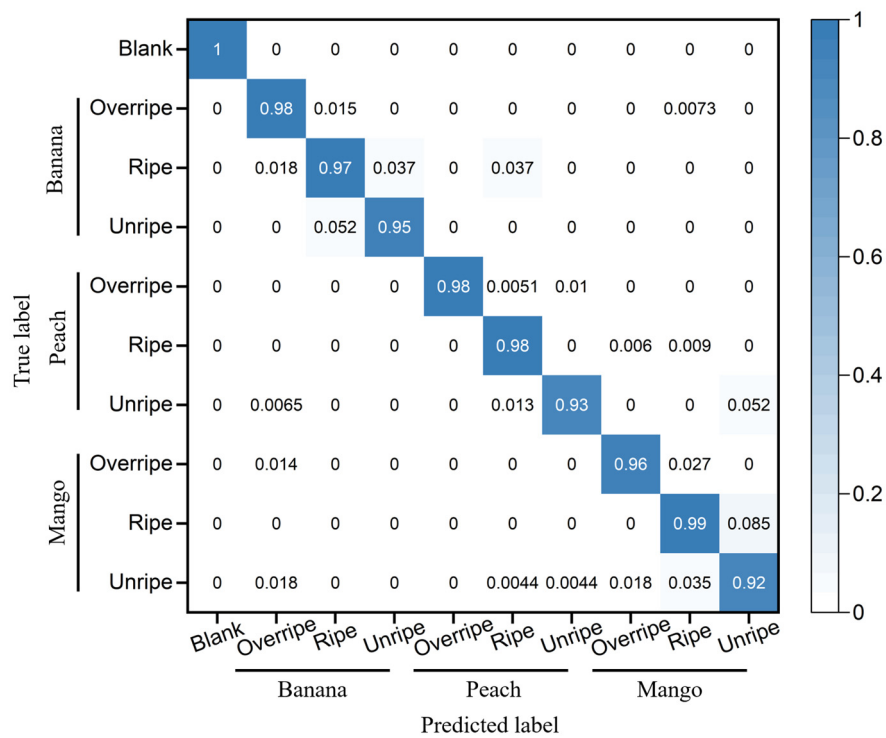

**Figure S14.** Confusion matrix of GoogleNet for validation set.

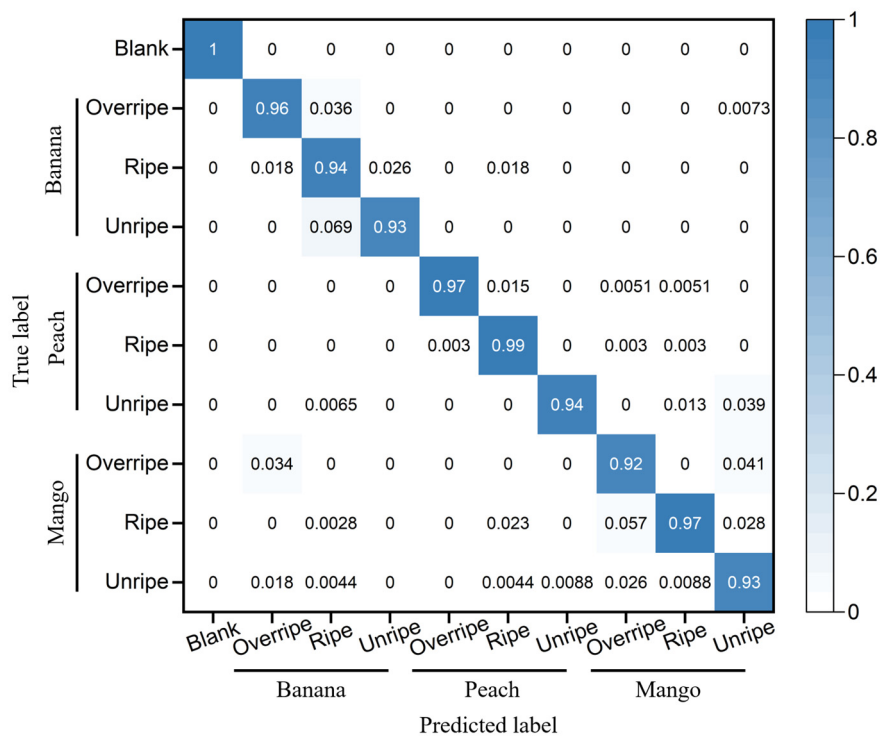

**Figure S15.** Confusion matrix of Inception\_v3 for validation set.

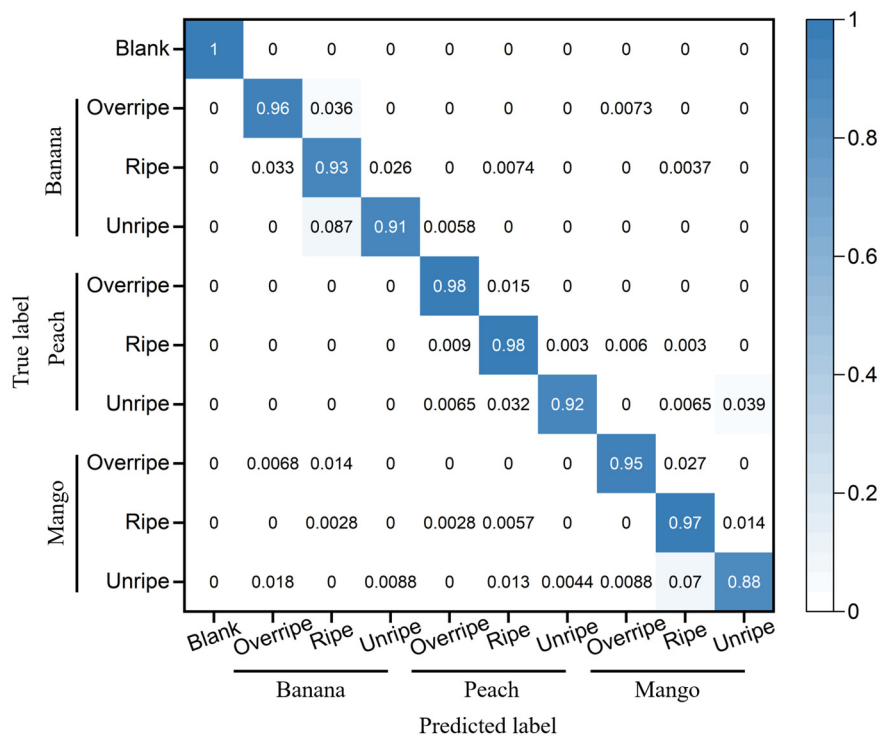

**Figure S16.** Confusion matrix of ResNet18 for validation set.

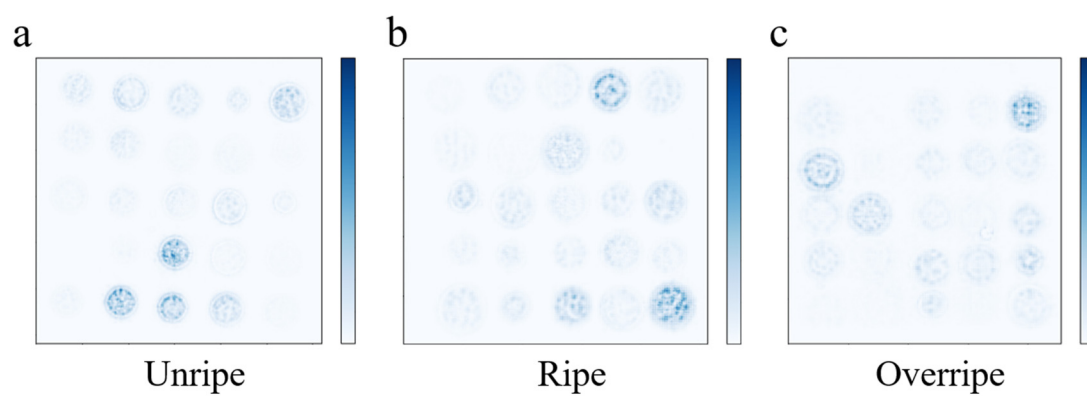

**Figure S17.** Attention mechanism maps of (a) unripe, (b) ripe, and (c) overripe mangoes. The
